# Supplementary material for: New Approach for Using of Mentha longifolia L. and Citrus reticulata L. Essential Oils as Wood-Biofungicides: GC-MS, SEM, and MNDO Quantum Chemical Studies
Source: PubMed Central journal article supplement (PMC7998113; doi:10.3390/ma14061361), 2021-03-11
Supplement: materials-14-01361-s001.pdf [file materials-14-01361-s001.pdf]

Article

# New Approach for Using of *Mentha longifolia* L. and *Citrus reticulata* L. Essential Oils as Wood-Biofungicides: GC-MS, SEM, and MNDO Quantum Chemical Studies

Hayssam M. Ali <sup>1,2</sup>, Wael A.A. Abo Elgat <sup>3</sup>, Mervat EL-Hefny <sup>4</sup>, Mohamed Z.M. Salem <sup>5,\*</sup>, Ayman S. Taha <sup>6</sup>, Dunia A. Al Farraj <sup>1</sup>, Mohamed S. Elshikh <sup>1</sup>, Ashraf A. Hatamleh <sup>1</sup> and Eslam M. Abdel-Salam <sup>1</sup>

<sup>1</sup> Botany and Microbiology Department, College of Science, King Saud University, P.O. Box 2455, Riyadh 11451, Saudi Arabia; hayhassan@ksu.edu.sa (H.M.A.); dfarraj@ksu.edu.sa (D.A.A.F.); melshikh@ksu.edu.sa (M.S.E.); ahataamleh@ksu.edu.sa (A.A.H.); 436108002@student.ksu.edu.sa (E.M.A.-S.)

<sup>2</sup> Agriculture Research Center, Timber Trees Research Department, Sabahia Horticulture Research Station, Horticulture Research Institute, Alexandria 21526, Egypt

<sup>3</sup> Restoration Department, High Institute of Tourism, Hotel Management and Restoration, Abukir, Alexandria 21526, Egypt; watsat20@yahoo.com

<sup>4</sup> Department of Floriculture, Ornamental Horticulture and Garden Design, Faculty of Agriculture (El-Shatby), Alexandria University, Alexandria 21545, Egypt; mervat.mohamed@alexu.edu.eg

<sup>5</sup> Forestry and Wood Technology Department, Faculty of Agriculture (EL-Shatby), Alexandria University, Alexandria 21545, Egypt

<sup>6</sup> Conservation Department, Faculty of Archaeology, Aswan University, Aswan 81528, Egypt; aymansalahtaha82@yahoo.com

\* Correspondence: mohamed-salem@alexu.edu.eg

**Citation:** Ali, H.M.; Abo Elgat, W.A.A.; EL-Hefny, M.; Salem, M.Z.M.; Taha, A.S.; Al Farraj, D.A.; Elshikh, M.S.; Hatamleh, A.A.; Abdel-Salam, E.M. New Approach for Using of *Mentha longifolia* L. and *Citrus reticulata* L. Essential Oils as Wood-Biofungicides: GC-MS, SEM and MNDO Quantum Chemical Studies. *Materials* **2021**, *14*, 1361. <https://doi.org/10.3390/ma14061361>

**Publisher's Note:** MDPI stays neutral with regard to jurisdictional claims in published maps and institutional affiliations.

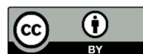

**Copyright:** © 2021 by the authors. Licensee MDPI, Basel, Switzerland. This article is an open access article distributed under the terms and conditions of the Creative Commons Attribution (CC BY) license (<http://creativecommons.org/licenses/by/4.0/>).

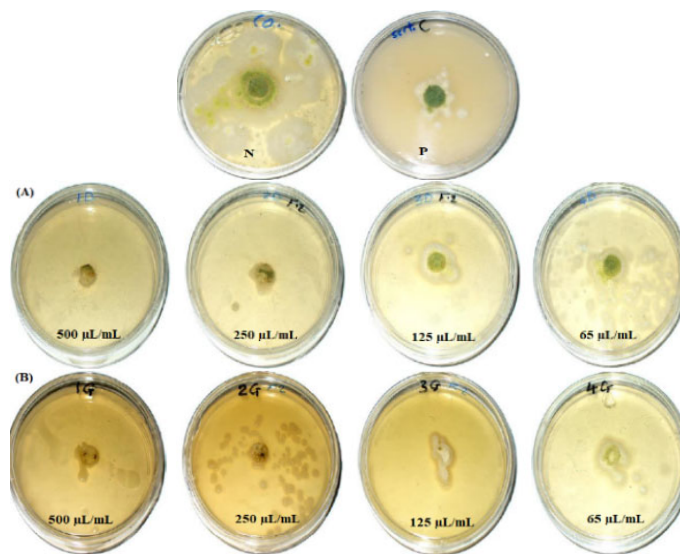

**Figure S1.** Visual observation of *Aspergillus flavus* growth inhibition as affected by the EOs from (A) *Mentha longifolia*; (B) *Citrus reticulata*; (P) Positive control (Sertaconazol 3 g/L); (N) Negative control (DMSO 10%).

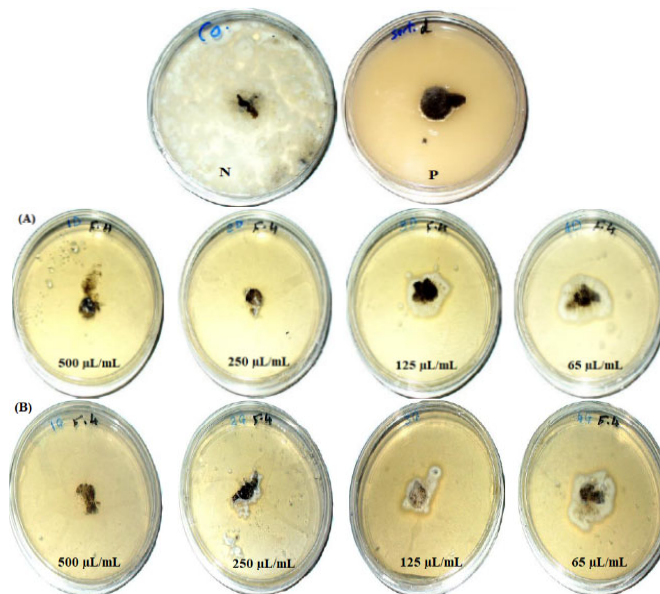

**Figure S2.** Visual observation of *Aspergillus niger* growth inhibition as affected by the EOs from (A) *Mentha longifolia*; (B) *Citrus reticulata*; (P) Positive control (Sertaconazol 3 g/L); (N) Negative control (DMSO 10%).

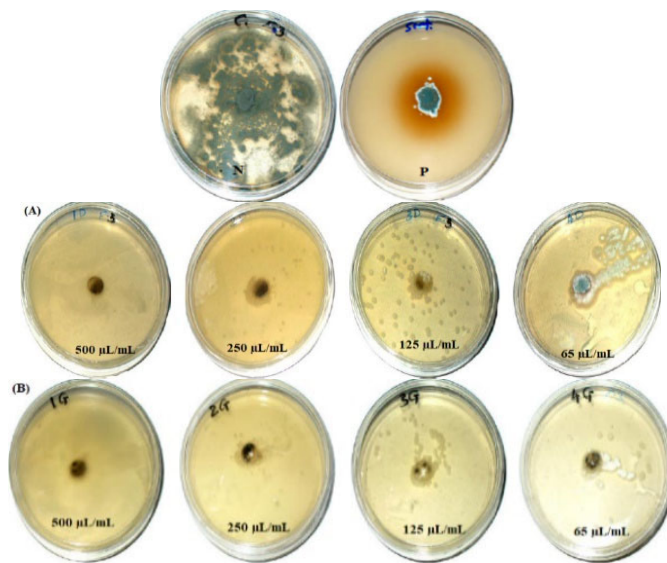

**Figure S3.** Visual observation of *Aspergillus fumigatus* growth inhibition as affected by the EOs from (A) *Mentha longifolia*; (B) *Citrus reticulata*; (P) Positive control (Sertaconazol 3 g/L); (N) Negative control (DMSO 10%).

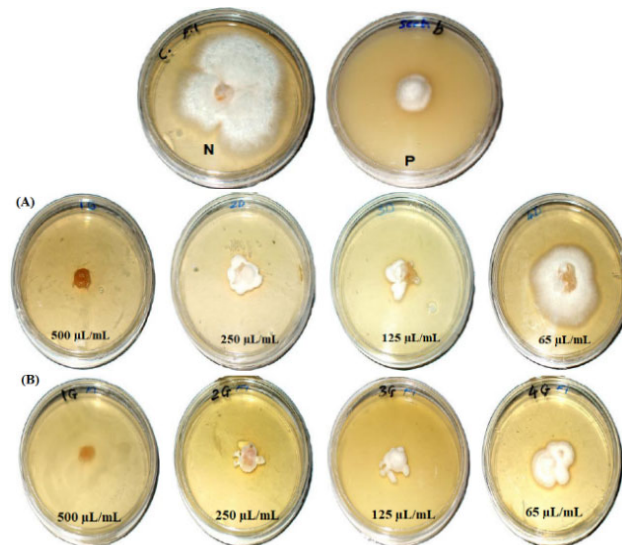

**Figure S4.** Visual observation of *Fusarium culmorum* growth inhibition as affected by the EOs from (A) *Mentha longifolia*; (B) *Citrus reticulata*; (P) Positive control (Sertaconazol 3 g/L); (N) Negative control (DMSO 10%).
